# Supplementary material
Source: Springer Nature journal article supplement (https://www.springermedizin.de/resource/supplementary/12960_2012_326_MOESM3_ESM.pdf/9569956)
Supplement: MOESM3 [file 9569956]

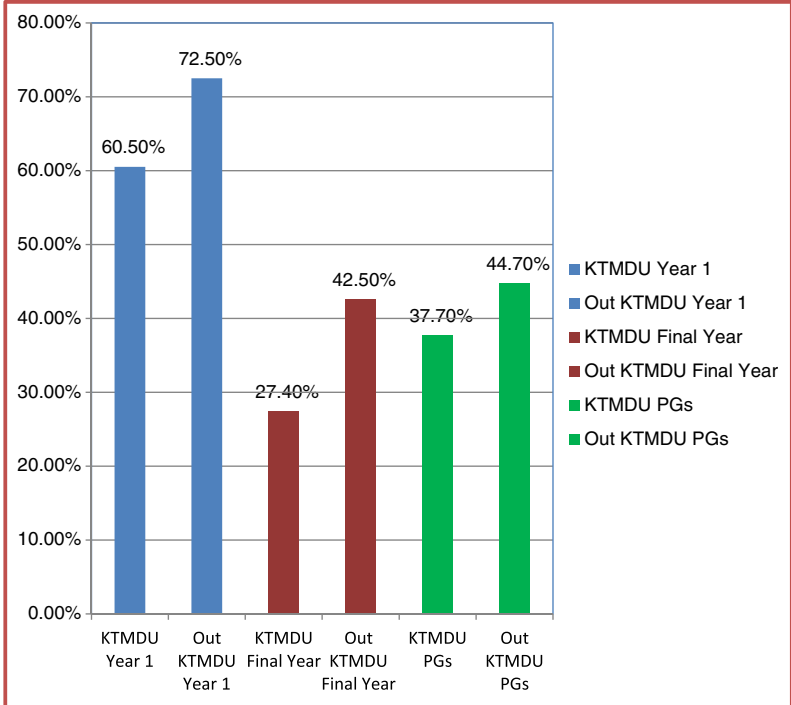

| Medical school                                             | % with choice of Career | p values (Chi square) using 0.05 as cutoff |
|------------------------------------------------------------|-------------------------|--------------------------------------------|
| KTMDU Year 1                                               | 124/205 (60.5%)         | p = 0.005                                  |
| Out KTMDU Year 1                                           | 222/306 (72.5%)         |                                            |
| KTMDU Final Year                                           | 54/197 (27.4%)          | p = 0.003                                  |
| Out KTMDU Final Year                                       | 74/174 (42.5%)          |                                            |
| KTMDU PGs(did MBBS in Kathmandu)                           | 57/151 (37.7%)          | p = 0.33                                   |
| Out KTMDU PGs (includes 5 who did MBBS out of the country) | 38/85(44.7%)            |                                            |
